# Supplementary material for: Aqueous heterogeneous oxygenation of hydrocarbons and sulfides catalyzed by recoverable magnetite nanoparticles coated with copper(ii) phthalocyanine
Source: Royal Society of Chemistry journal article supplement (doi:10.1039/c2gc35837a), 2012-01-01
Supplement: c2gc35837a.pdf [file c2gc35837a.pdf]

## Supporting Information

# **Aqueous Heterogeneous Oxygenation of Hydrocarbons and Sulfides Catalyzed by Recoverable Magnetite Nanoparticles Coated with Copper (II) Phthalocyanine**

Abdolreza Rezaeifard,\* Maasoumeh Jafarpour,\* Atena Naeimi and Reza Haddad

Table S1. The oxidation of indane using aqueous solution of TBAOX catalyzed by **CuPcS@ASMNP**

| Run | Indane/TBAOX/Catalyst<br>Molar Ratio | Total<br>conversion | T/°C | Time/min |
|-----|--------------------------------------|---------------------|------|----------|
| 1   | 200:600:1                            | 0                   | 70   | 90       |
| 2   | 200:600:1                            | 10                  | 70   | 180      |
| 3   | 200:600:1                            | 57                  | 80   | 180      |
| 4   | 100:300:1                            | 90                  | 80   | 180      |

Table S2. Screening of solvents and quantity of the catalyst in the oxidation of methylphenylsulfide<sup>a)</sup>

| Entry | Catalyst<br>mol% | Equivalent of<br>TBAOX | Solvent                    | Conversion<br>%       | Sulfoxide<br>Selectivity % <sup>b</sup> |
|-------|------------------|------------------------|----------------------------|-----------------------|-----------------------------------------|
| 1     | 0 <sup>b</sup>   | 3                      | H <sub>2</sub> O           | 70                    | 44                                      |
| 2     | 0.5              | 3                      | H <sub>2</sub> O           | 100                   | 0                                       |
| 3     | 1                | 1                      | H <sub>2</sub> O           | 60                    | 65                                      |
| 4     | 0.5              | 2                      | H <sub>2</sub> O           | 80                    | 35                                      |
| 5     | 1                | 2                      | H <sub>2</sub> O           | 90                    | 40                                      |
| 6     | 0.5              | 1                      | H <sub>2</sub> O           | 45                    | 77                                      |
| 7     | 0.5 <sup>c</sup> | 1                      | H <sub>2</sub> O           | 40                    | 90                                      |
| 8     | 0.5              | 1                      | H <sub>2</sub> O/EtOH(2/1) | 50                    | 80                                      |
| 9     | 0.5              | 1                      | H <sub>2</sub> O/EtOH(1/1) | 65                    | 85                                      |
| 10    | 0.5              | 1                      | H <sub>2</sub> O/EtOH(1/2) | 80(100 <sup>d</sup> ) | 100(100)                                |
| 11    | 0.5              | 1                      | H <sub>2</sub> O/EtOH(1/3) | 80                    | 100                                     |

|    |     |   |                            |     |    |
|----|-----|---|----------------------------|-----|----|
| 12 | 0.5 | 1 | EtOH                       | 35  | 85 |
| 13 | 0.5 | 1 | H <sub>2</sub> O/EtOH(1/2) | 100 | -  |

- a) GC yield  
b) Reaction condition: The reactions were run at room temperature within 1h.  
c) Reaction condition: The reactions were run at 0°C within 1h.  
d) Reaction condition: The reactions were run at room temperature within 1.5h.

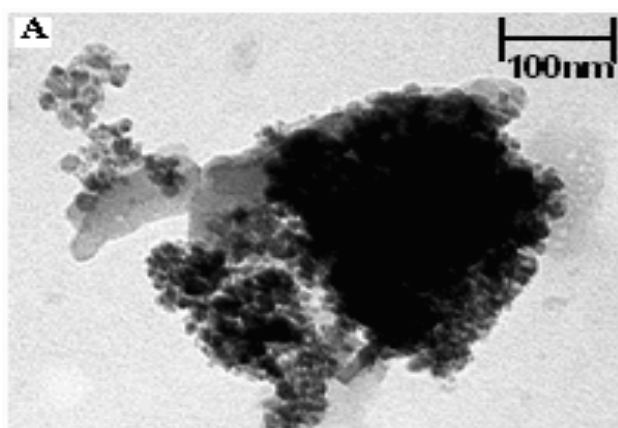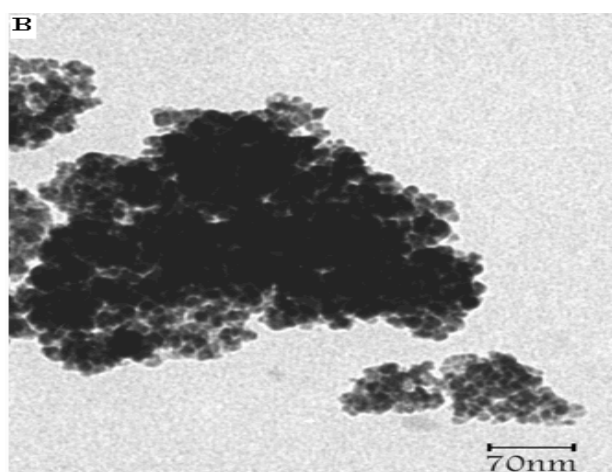

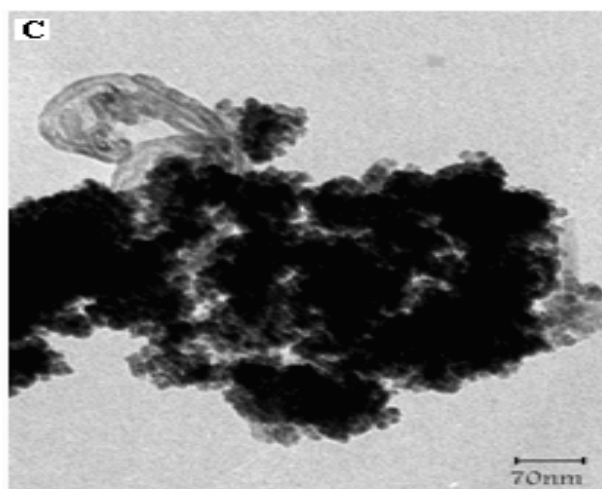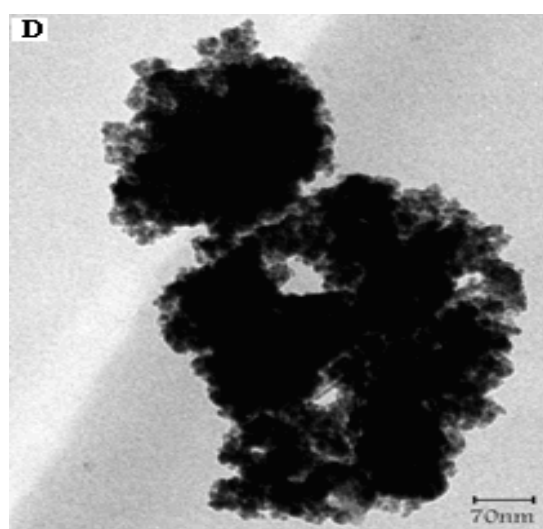

Fig. S1. TEM images of **CuPcS@ASMNP** stirred in aqueous solution of  $\text{H}_2\text{O}_2$  (A) TBHP (B) PhIO (C) and Oxone<sup>®</sup> (D) at 70 °C.
